# Supplementary material
Source: PubMed Central journal article supplement (PMC555975)

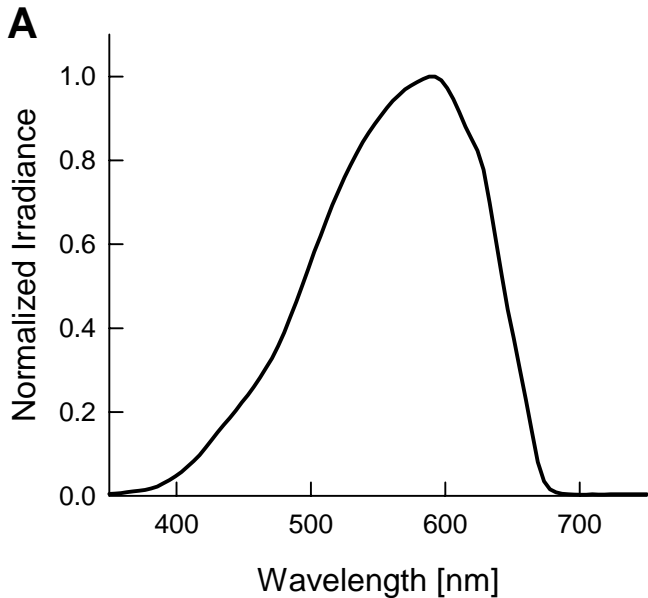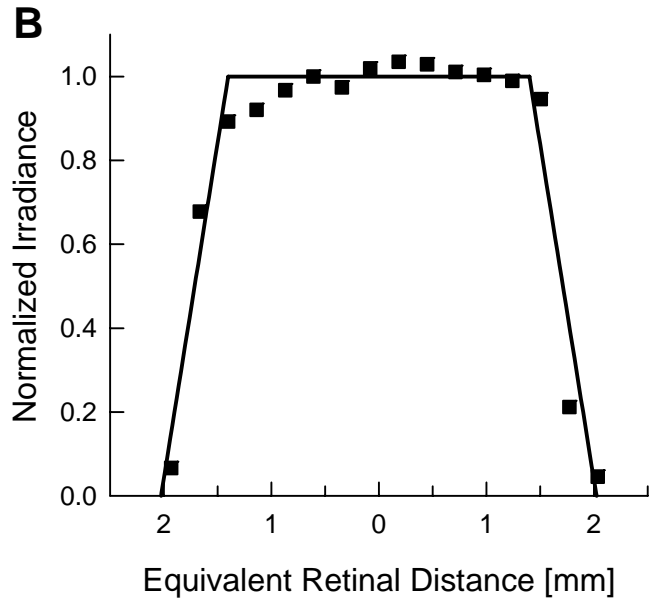

Supplement: pnas_102_14_5233__1.pdf [file pnas_102_14_5233__1.pdf]

**A** Outside lesion

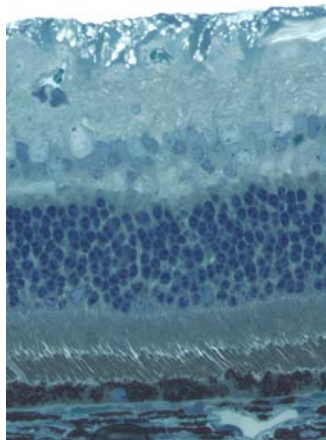

**B** Border of lesion

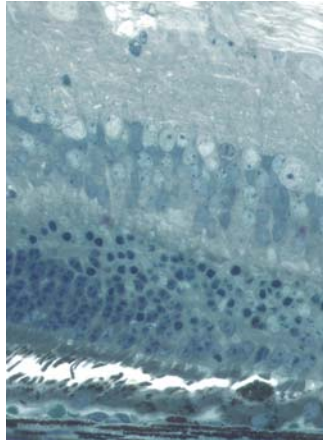

50  $\mu$ m

**C**  
Inside lesion

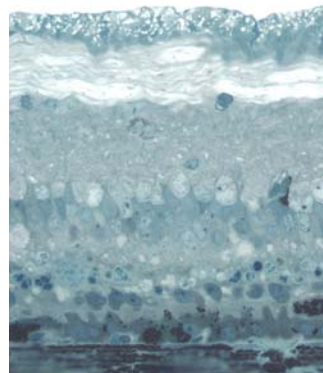

Supplement: pnas_102_14_5233__2.pdf [file pnas_102_14_5233__2.pdf]

# Canine *RHO* mutation

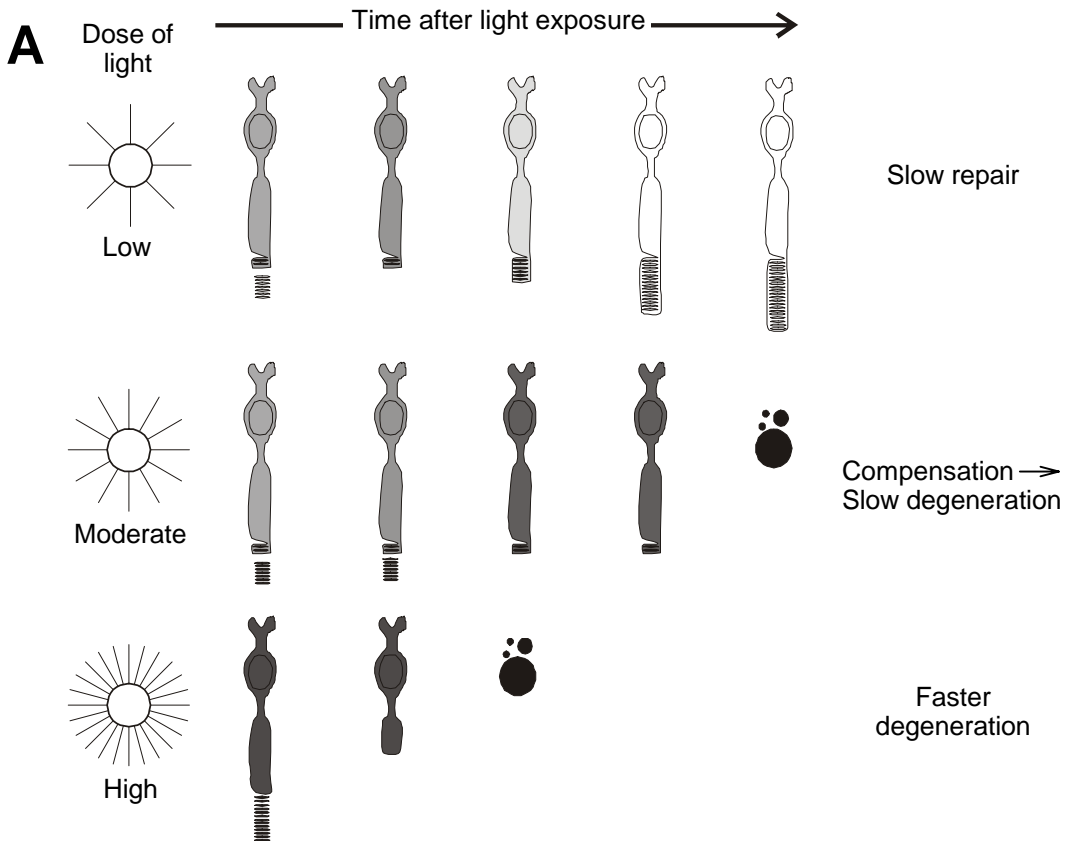

# Human *RHO* mutations

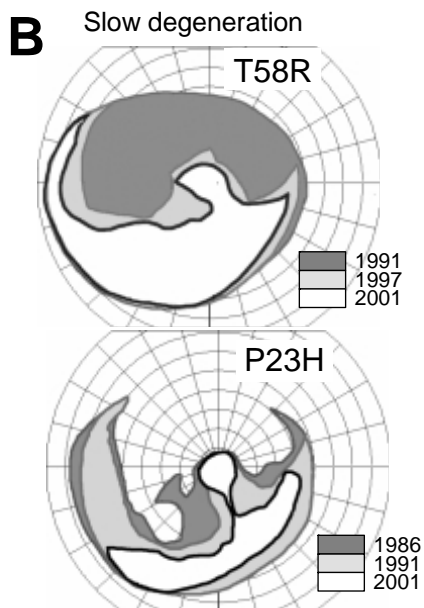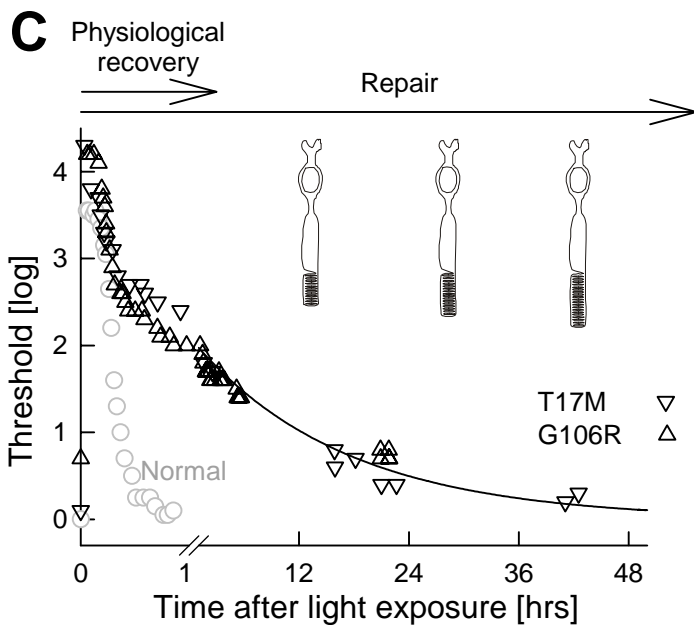

Supplement: pnas_102_14_5233__3.pdf [file pnas_102_14_5233__3.pdf]
